# Supplementary material for: Ability to detect antibodies to beak and feather disease virus in blood on filter paper decreases with duration of storage
Source: PeerJ journal article supplement (doi:10.7717/peerj.12642), 2021-12-20
Supplement: Table_S1_revised_5Oct21.doc [file Table_S1_revised_5Oct21.doc]

**Supplemental Table S1: HI assay results for both live-trapped and necropsied birds.**

Antibody titres are shown for both filter paper and serum samples. Blank cells indicate those samples were not tested at that date. “Time death to sampling” indicates the time that the bird was dead before samples were collected from it (not applicable to live-trapped birds). “BFDV in blood” indicates qPCR results for blood stored in ethanol (Cq values shown for positive samples (Cq<36), and “neg” indicates BFDV DNA was not detected). “Weeks in storage” shows the weeks that each sample was stored for prior to HI testing. In grey and bold we highlight where antibody titres were detected in at least one sample type for each HI assay. B3r indicates samples obtained during recapture of B3. Each sample (except for B3r and B7-9) was assayed in either HI assay 1 or 2 (initial assay), and retested in HI assay 3 (repeat assay). Serum, when available, was only tested during HI assay 3 (“-“ indicates serum was not available).

|  |  |  |  |  |  | **HI assay 1**  (May 2019) | | **HI assay 2**  (September 2020) | | **HI assay 3**  (November 2020) | |
| --- | --- | --- | --- | --- | --- | --- | --- | --- | --- | --- | --- |
| **Bird ID** | **Age** | **Subset** | **Date sampled** | **Time death to sampling** | **BFDV in blood** | **Weeks in storage** | **HI titre (paper)** | **Weeks in storage** | **HI titre (paper)** | **Weeks in storage** | **HI titre (paper / serum)** |
| B1 | Adult | Live-trapped | 6/5/19 | n/a | neg | 3 | **1:640** |  |  | 81 | <1:20 / **1:320** |
| B2 | Adult | Live-trapped | 30/4/19 | n/a | neg | 3 | **1:160** |  |  | 82 | <1:20 / **1:320** |
| B3 | Adult | Live-trapped | 30/4/19 | n/a | neg | 3 | **1:160** |  |  | 82 | <1:20 / **1:160** |
| B4 | Adult | Live-trapped | 15/4/19 | n/a | neg | 6 | **1:320** |  |  | 84 | <1:20 / - |
| B5 | Adult | Live-trapped | 15/4/19 | n/a | neg | 6 | **1:640** |  |  | 84 | <1:20 / **1:640** |
| B6 | Adult | Live-trapped | 12/4/19 | n/a | neg | 6 | **1:320** |  |  | 85 | <1:20 / - |
| B3r | Adult | Live-trapped | 27/8/19 | n/a | neg |  |  |  |  | 65 | <1:20 / **1:160** |
| B7 | Subadult | Live-trapped | 7/5/19 | n/a | Cq 25 |  |  |  |  | 81 | <1:20 / **1:160** |
| B8 | Adult | Live-trapped | 30/4/19 | n/a | neg |  |  |  |  | 82 | <1:20 / **1:1280** |
| B9 | Adult | Live-trapped | 15/4/19 | n/a | neg |  |  |  |  | 84 | <1:20 / **1:320** |
| B10 | Subadult | Necropsied | 24/6/20 | 1h | Cq 27 |  |  | 13 | <1:20 | 22 | <1:20 / - |
| B11 | Adult | Necropsied | 26/5/20 | 30 min | neg |  |  | 17 | **1:40** | 26 | <1:20 / - |
| B12 | Adult | Necropsied | 14/5/20 | 5 min | neg |  |  | 19 | **1:20** | 28 | <1:20 / - |
| B13 | Subadult | Necropsied | 6/6/19 | 9h | Cq 35 |  |  | 68 | **1:20** | 77 | <1:20 / - |
| B14 | Subadult | Necropsied | 6/6/19 | 10h | Cq 31 |  |  | 68 | <1:20 | 77 | <1:20 / - |
| B15 | Adult | Necropsied | 31/5/19 | 24h | neg |  |  | 68 | <1:20 | 78 | <1:20 / - |
| B16 | Adult | Necropsied | 31/5/19 | 24h | neg |  |  | 68 | <1:20 | 78 | <1:20 / - |
| B17 | Adult | Necropsied | 28/5/19 | 28h | neg |  |  | 69 | <1:20 | 78 | <1:20 / - |
| B18 | Adult | Necropsied | 28/5/19 | 30h | neg |  |  | 69 | **1:40** | 78 | <1:20 / - |
| B19 | Adult | Necropsied | 17/5/19 | 6h | neg |  |  | 70 | <1:20 | 80 | <1:20 / - |
| B20 | Subadult | Necropsied | 17/5/19 | 30h | neg |  |  | 70 | <1:20 | 80 | <1:20 / - |
